# Supplementary figures and images for: A Randomized Controlled Trial Evaluating the Effectiveness of Supported Employment Integrated in Primary Care
Source: Atypon-hosted journal article supplement (doi:10.1176/appi.ps.202000926), 2021-09-15

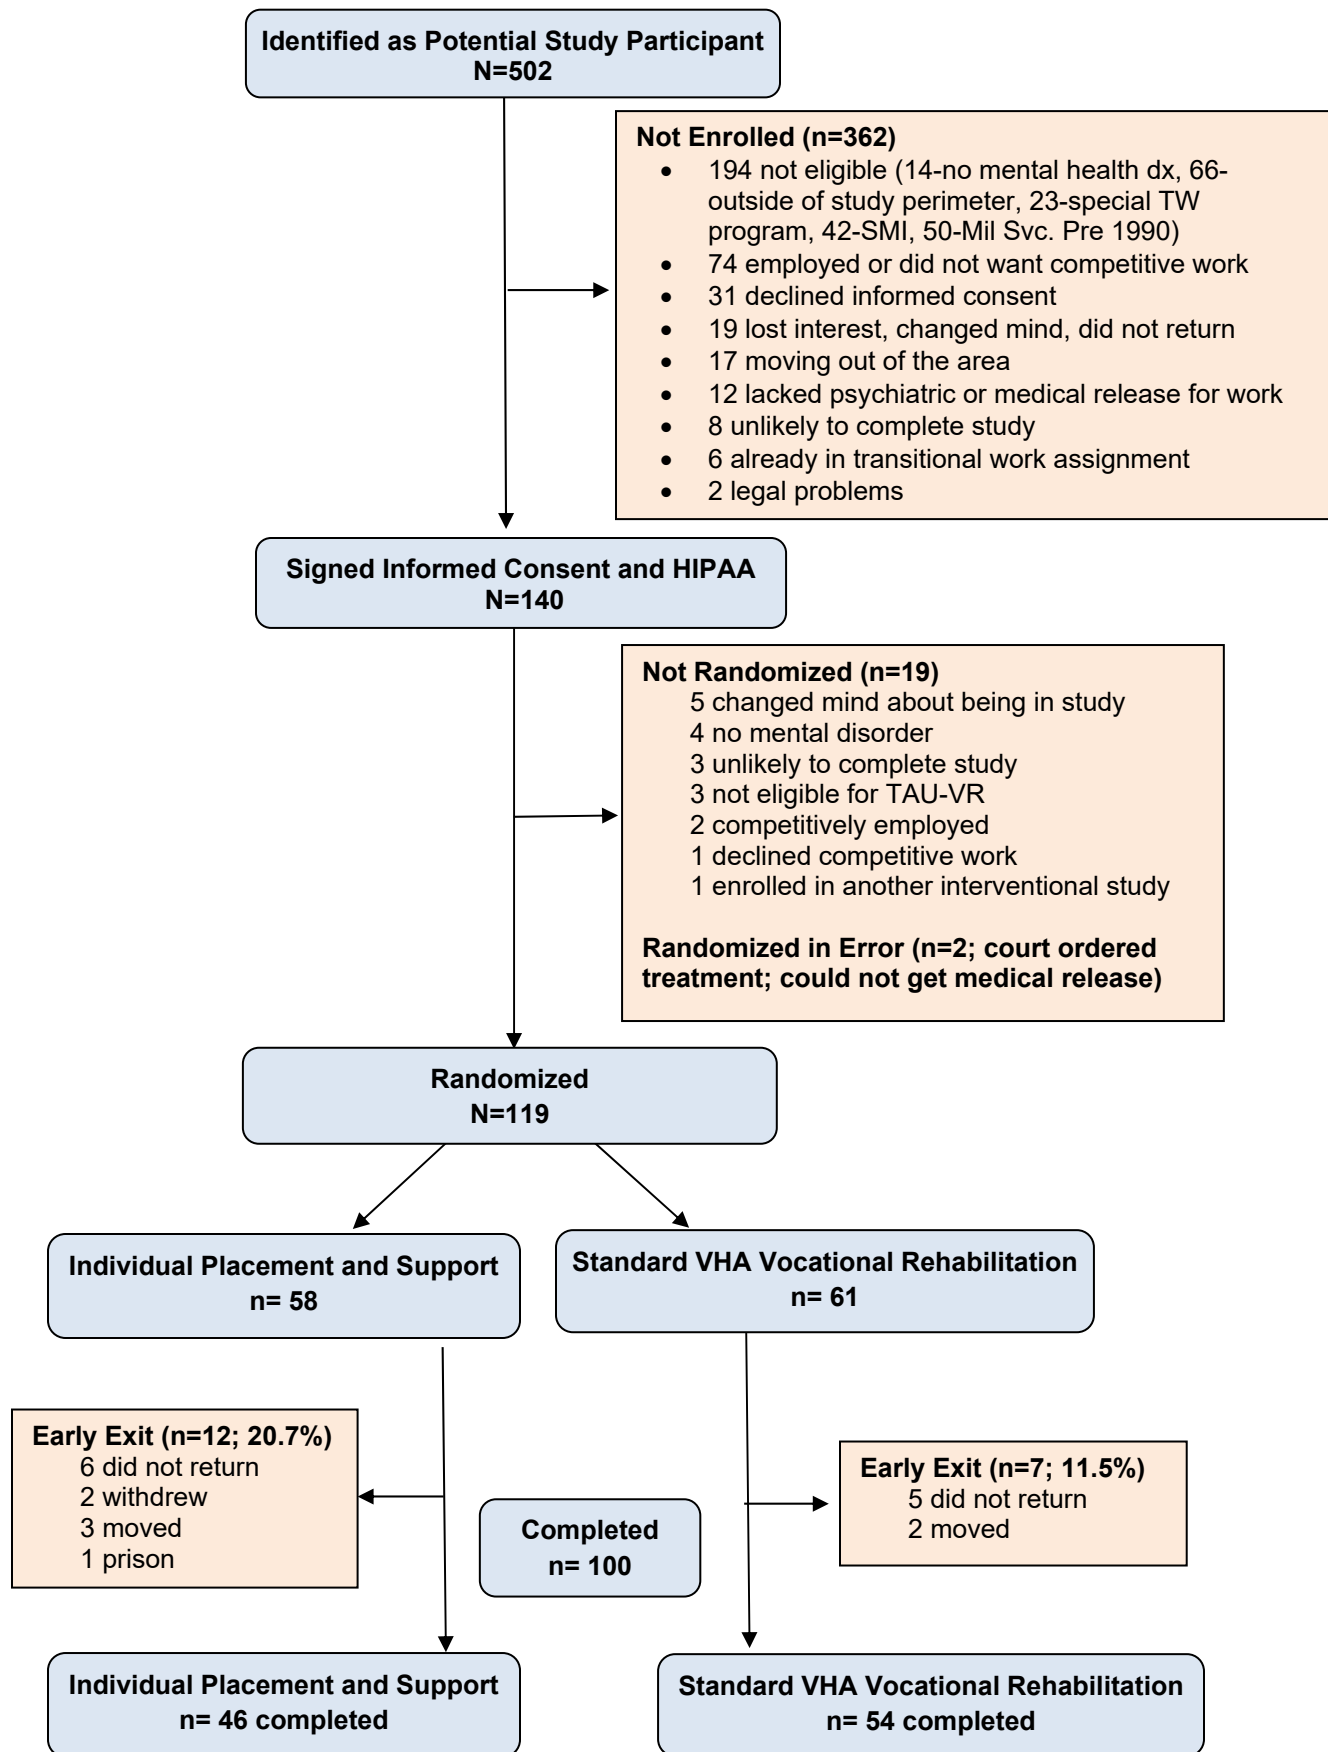

Supplement: appi.ps.202000926.ds001.pdf [file appi.ps.202000926.ds001.pdf]
